# Supplementary material for: Factores farmacocinéticos que condicionan la respuesta a los fármacos en animales neonatos y geriátricos
Source: MDPI journal article supplement (doi:10.3390/jcm12062201), 2009-01-01
Supplement: s1 [file s1]

Supplemental Table S1. The clinical indexes and laboratory parameters at week 0, 4 and 24 of upadacitinib treatment, and the comparisons between the stages ( $n = 65$ )

|        | Median [interquartile range] |                     |                       |                    | $p$                  |                       |                       |                       |                       |                        |
|--------|------------------------------|---------------------|-----------------------|--------------------|----------------------|-----------------------|-----------------------|-----------------------|-----------------------|------------------------|
|        | Week 0                       | Week 4              | Week 12               | Week 24            | Week 0 versus week 4 | Week 0 versus week 12 | Week 0 versus week 24 | Week 4 versus week 12 | Week 4 versus week 24 | Week 12 versus week 24 |
| EASI   | 20.4 [16.6-32]               | 4.4 [2.4-7.1]       | 3.85 [2.5-9.25]       | 4.2 [2.175-7.725]  | 0.0000000047**       | 0.000000005**         | 0.0000000091**        | 1                     | 1                     | 1                      |
| PP-NRS | 8 [7-10]                     | 2 [1-3]             | 2 [1-5]               | 2 [1-3]            | 0.00000002**         | 0.000000012**         | 0.000000127**         | 0.71                  | 0.91                  | 1                      |
| ELR    | 0.22 [0.13-0.47]             | 0.09 [0.06-0.09]    | 0.12 [0.07-0.22]      | 0.13 [0.07-0.3]    | 0.00000000059**      | 0.0000082**           | 0.002**               | 0.3924                | 0.0071                | 1                      |
| NLR    | 2.23 [1.65-2.81]             | 1.49 [1.09-2.14]    | 1.66 [1.4-2.29]       | 1.7 [1.31-2.37]    | 0.000013**           | 0.00082**             | 0.0177*               | 0.666                 | 1                     | 1                      |
| MLR    | 0.21 [0.17-0.28]             | 0.17 [0.12-0.22]    | 0.2 [0.14-0.26]       | 0.21 [0.17-0.29]   | 0.0000039**          | 0.1362                | 1                     | 0.00158**             | 0.00044**             | 0.3588                 |
| PLR    | 156.6 [112.4-214]            | 139.8 [108.7-196.8] | 170.871 [120.1-214.2] | 152 [134.47-210.9] | 0.0086**             | 1                     | 1                     | 0.0666                | 0.0852                | 1                      |

\*Statistically significant at  $p < 0.05$ , \*\* at  $p < 0.01$ , analyzed by Friedman's test.  
EASI, eczema area and severity index; PP-NRS, peak pruritus-numerical rating score; ELR, eosinophil-to-lymphocyte ratio; NLR, neutrophil-to-lymphocyte ratio; MLR, monocyte-to-lymphocyte ratio; PLR, platelet-to-lymphocyte ratio
